# Supplementary material
Source: PubMed Central journal article supplement (PMC3196856)
Supplement: supp_124.20.3399_JCS086710TableS1.pdf [file supp_124.20.3399_JCS086710TableS1.pdf]

**Supplementary Table 1. List of PCR primers**

| Accession Number | Sequence Definition                                                   | Sense/Anti-sense Primers                            |
|------------------|-----------------------------------------------------------------------|-----------------------------------------------------|
| <i>mouse</i>     |                                                                       |                                                     |
| NM_008084        | glyceraldehyde-3-phosphate dehydrogenase (Gapdh)                      | CAGTGAGCTTCCGGTTCA<br>CTGCACCCAGAAG                 |
| NM_010495        | inhibitor of DNA binding 1 (Id1)                                      | GCATCTTGTGTCGCTGAG<br>AGGCTGAAAGGTGGAGAG            |
| NM_010496        | inhibitor of DNA binding 2 (Id2)                                      | GCCATTTCCACCAGGAGAAC<br>AATAACGGT ATCACAGT CCAG     |
| NM_008321        | inhibitor of DNA binding 3 (Id3)                                      | GCATGGATGAGCTTCGATCTTAAC<br>TTCTCTCGGGCTCCAGGTC     |
| NM_013601        | homeobox, msh-like 2 (Msx2)                                           | GCCTGTTGGACTCTATG<br>TCGCTTAGGGTGACAATG             |
| NM_008960        | phosphatase and tensin homolog (Pten)                                 | TTGTTGGTGTGAGGATGGTAGG<br>GCCCTCCATCTCCTTCACTTAC    |
| NM_001168491     | programmed cell death 4 (Pcd4)                                        | CCCACTCATACTCTGTTCTTG<br>GCCCTCCATCTCCTTCACTTAC     |
| NM_011595        | tissue inhibitor of metalloproteinase 3 (Timp3)                       | TCGGCTGTTTGGGTTGAG<br>CTCTGGCTGGTGTCTCTTC           |
| NM_024427        | tropomyosin 1, alpha (Tpm1)                                           | CATTGATGACTTAGAAGAG<br>GACTTGGAATCTCAGAAGAC         |
| <i>human</i>     |                                                                       |                                                     |
| NM_002046        | glyceraldehyde-3-phosphate dehydrogenase (GAPDH)                      | TCTCTGCTCCTCCTGTTC<br>ACCAAATCCGTTGACTCC            |
| NM_000314        | phosphatase and tensin homolog (PTEN)                                 | TCTGAAGTTACTTGAAGG<br>AAGAATGGTGATGCTATT            |
| NM_001199492     | programmed cell death 4 (neoplastic transformation inhibitor) (PDCD4) | ATGAGGGTACTGTTAGGAGTATAC<br>GCACTTGAGAATAAAATGACTGC |
| NM_000362        | TIMP metalloproteinase inhibitor 3 (TIMP3)                            | TTGGAGGCGAGAGGAAGG<br>AGACTGGCTAAAGGGAAAGG          |
| NM_000366        | tropomyosin 1, alpha (TPM1)                                           | CAAGGGCACCGAAGATGAACTG<br>TCCTGGGCACGATCCAATC       |
